# Supplementary material for: Charge transfer induced polymerization of EDOT confined between 2D titanium carbide layers
Source: Royal Society of Chemistry journal article supplement (doi:10.1039/c7ta00149e), 2017-01-01
Supplement: c7ta00149e1.pdf [file c7ta00149e1.pdf]

## Supporting Information

### Charge Transfer Induced Polymerization of EDOT Confined between 2D Titanium Carbide Layers

Chi Chen,<sup>a,b</sup> Muhammad Boota,<sup>a</sup> Xiuqiang Xie,<sup>a,c</sup> Mengqiang Zhao,<sup>a</sup> Babak Anasori,<sup>a</sup> Chang E. Ren,<sup>a</sup>  
Ling Miao,<sup>b</sup> Jianjun Jiang,<sup>\*b</sup> Yury Gogotsi<sup>\*a</sup>

*a.* A.J. Drexel Nanomaterials Institute, and Materials Science and Engineering Department, Drexel University, 3141 Chestnut Street, Philadelphia, PA 19104, USA. Email: [gogotsi@drexel.edu](mailto:gogotsi@drexel.edu)

*b.* School of Optical and Electronic Information, Huazhong University of Science and Technology, Wuhan, Hubei 430074, People's Republic of China. Email: [jiangjj@mail.hust.edu.cn](mailto:jiangjj@mail.hust.edu.cn)

*c.* Centre for Clean Energy Technology, School of Mathematical and Physical Sciences, University of Technology Sydney, Broadway, Sydney, NSW 2007, Australia.

To determine the polymer content, we carried out the thermogravimetric analysis (TGA) for pristine  $\text{Ti}_3\text{C}_2\text{T}_x$  and  $\text{Ti}_3\text{C}_2\text{T}_x/\text{PEDOT}$  hybrid as shown in Figure S1. We set 450 °C as the cut-off temperature, as the burning of MXene and its hybrids beyond this temperature leads to oxidation of  $\text{Ti}_3\text{C}_2\text{T}_x$  which, in turn, increases the sample weight. The weight loss in the MXene TGA curve is due to the trapped water between the layers.

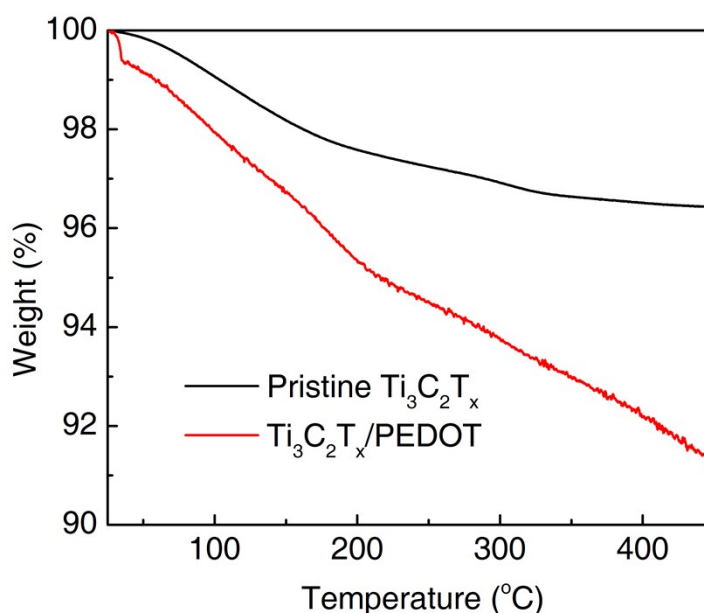

Figure S1: Thermogravimetric analysis for pristine  $\text{Ti}_3\text{C}_2\text{T}_x$  and  $\text{Ti}_3\text{C}_2\text{T}_x/\text{PEDOT}$  hybrid.
